# Supplementary material for: Plant Fibers in Comparison with Other Fining Agents for the Reduction of Pesticide Residues and the Effect on the Volatile Profile of Austrian White and Red Wines
Source: MDPI journal article supplement (doi:10.3390/app11125365), 2021-06-09
Supplement: s1 [file s1]

**Table S1:** sample list (wine)

| <b>Number</b> | <b>Colour</b> | <b>Cultivar</b>    | <b>production</b> | <b>Vintage</b> | <b>Origin</b> |
|---------------|---------------|--------------------|-------------------|----------------|---------------|
| 1             | W             | Welschriesling     | Conventional      | 14             | Burgenland    |
| 2             | W             | Welschriesling     | Conventional      | 14             | Lower Austria |
| 3             | W             | Welschriesling     | Conventional      | 14             | Lower Austria |
| 4             | W             | Chardonnay         | Conventional      | 13             | Vienna        |
| 5             | W             | Welschriesling     | Conventional      | 14             | Lower Austria |
| 6             | W             | Welschriesling     | Conventional      | 14             | Lower Austria |
| 7             | W             | Welschriesling     | Conventional      | 14             | Burgenland    |
| 8             | W             | Welschriesling     | Conventional      | 14             | Burgenland    |
| 9             | W             | Welschriesling     | Conventional      | 14             | Burgenland    |
| 10            | W             | Welschriesling     | Conventional      | 14             | Styria        |
| 11            | W             | Chardonnay         | Conventional      | 12             | Lower Austria |
| 12            | W             | Chardonnay         | Conventional      | 14             | Burgenland    |
| 13            | W             | Rheinriesling      | Conventional      | 16             | Styria        |
| 14            | W             | Gelber Muskateller | Conventional      | 14             | Styria        |
| 15            | W             | Chardonnay         | Conventional      | 14             | Burgenland    |
| 16            | W             | Rotgipfler         | Conventional      | 13             | Lower Austria |
| 17            | W             | Chardonnay         | organic           | 15             | Burgenland    |
| 18            | W             | Welschriesling     | Conventional      | 14             | Styria        |
| 19            | W             | Roter Veltliner    | Conventional      | 14             | Lower Austria |
| 20            | W             | Rheinriesling      | Conventional      | 14             | Styria        |
| 21            | W             | Chardonnay         | Conventional      | 14             | Styria        |
| 22            | W             | Sauvignon blanc    | Conventional      | 14             | Styria        |
| 23            | W             | Traminer           | Conventional      | 14             | Styria        |
| 24            | W             | Rheinriesling      | Conventional      | 14             | Lower Austria |
| 25            | W             | Weißburgunder      | Conventional      | 14             | Styria        |
| 26            | W             | GT                 | Conventional      | 14             | Lower Austria |
| 27            | W             | Chardonnay         | Conventional      | 14             | Lower Austria |
| 28            | W             | Sauvignon blanc    | Conventional      | 14             | Styria        |
| 29            | W             | Rheinriesling      | organic           | 13             | Lower Austria |
| 30            | W             | Chardonnay         | Conventional      | 14             | Kärnten       |
| 31            | W             | Sauvignon blanc    | Conventional      | 14             | Lower Austria |
| 32            | W             | Chardonnay         | Conventional      | 14             | Burgenland    |

|    |      |                          |              |    |               |
|----|------|--------------------------|--------------|----|---------------|
| 33 | W    | Weißburgunder            | Conventional | 14 | Lower Austria |
| 34 | Rosé | Cabernet Sauvignon       | Conventional | 14 | Lower Austria |
| 35 | W    | Welschriesling           | Conventional | 14 | Styria        |
| 36 | W    | Weißburgunder            | Conventional | 13 | Lower Austria |
| 37 | W    | Grüner Veltliner         | biodynamic   | 14 | Styria        |
| 38 | W    | Grüner Veltliner         | Conventional | 14 | Styria        |
| 39 | W    | Grüner Veltliner         | Conventional | 14 | Styria        |
| 40 | W    | Grüner Veltliner         | Conventional | 14 | Styria        |
| 41 | W    | Weißburgunder            | Conventional | 14 | Burgenland    |
| 42 | W    | Chardonnay               | Conventional | 14 | Styria        |
| 43 | W    | Chardonnay               | Conventional | 14 | Burgenland    |
| 44 | W    | Sauvignon blanc          | Conventional | 14 | Burgenland    |
| 45 | W    | Viennaer Gemischter Satz | Conventional | 14 | Vienna        |
| 46 | W    | Rotgipfler               | Conventional | 13 | Lower Austria |
| 47 | W    | Grüner Veltliner         | Conventional | 13 | Lower Austria |
| 48 | W    | Grüner Veltliner         | Conventional | 13 | Lower Austria |
| 49 | W    | Welschriesling           | Conventional | 13 | Burgenland    |
| 50 | W    | Welschriesling           | Conventional | 13 | Lower Austria |
| 51 | W    | Welschriesling           | Conventional | 13 | Lower Austria |
| 52 | W    | Grüner Veltliner DAC     | Conventional | 13 | Lower Austria |
| 53 | W    | Chardonnay               | Conventional | 13 | Lower Austria |
| 54 | W    | Chardonnay               | Conventional | 13 | Burgenland    |
| 55 | W    | Chardonnay               | Conventional | 13 | Vienna        |
| 56 | W    | Grüner Veltliner         | Conventional | 13 | Lower Austria |
| 57 | W    | Chardonnay               | Conventional | 13 | Burgenland    |
| 58 | W    | Grüner Veltliner         | Conventional | 13 | Lower Austria |
| 59 | W    | Welschriesling           | Conventional | 13 | Lower Austria |
| 60 | W    | Muskat Ottonellrillon    | Conventional | 13 | Styria        |
| 61 | W    | Grüner Veltliner DAC     | Conventional | 14 | Lower Austria |
| 62 | W    | Grüner Veltliner DAC     | Conventional | 13 | Lower Austria |
| 63 | W    | Grüner Veltliner         | Conventional | 13 | Lower Austria |
| 64 | W    | Grüner Veltliner         | Conventional | 13 | Lower Austria |
| 65 | W    | Grüner Veltliner         | Conventional | 12 | Lower Austria |
| 66 | W    | Grüner Veltliner         | Conventional | 13 | Lower Austria |
| 67 | Rosé | Zweigelt                 | Conventional | 13 | Lower Austria |

|     |      |                       |              |    |               |
|-----|------|-----------------------|--------------|----|---------------|
| 68  | W    | Grüner Veltliner      | Conventional | 13 | Lower Austria |
| 69  | W    | Chardonnay            | Conventional | 13 | Lower Austria |
| 70  | W    | Grüner Veltliner DAC  | Conventional | 13 | Lower Austria |
| 71  | W    | Chardonnay            | Conventional | 13 | Lower Austria |
| 72  | W    | Grüner Veltliner      | Conventional | 13 | Lower Austria |
| 73  | W    | Cuvée                 | Conventional | 13 | Lower Austria |
| 74  | W    | Traminer Beereauslese | Conventional | 15 | Lower Austria |
| 75  | W    | Muskat Otonell        | Conventional | 13 | Burgenland    |
| 76  | W    | Muskat Otonell        | Conventional | 13 | Styria        |
| 77  | W    | Chardonnay            | Conventional | 13 | Lower Austria |
| 78  | W    | Chardonnay            | Conventional | 12 | Burgenland    |
| 79  | W    | Chardonnay            | Conventional | 11 | Lower Austria |
| 80  | W    | Chardonnay            | Conventional | 13 | Lower Austria |
| 81  | W    | Chardonnay            | Conventional | 13 | Lower Austria |
| 82  | W    | Chardonnay            | Conventional | 12 | Lower Austria |
| 83  | W    | Welschriesling        | Conventional | 13 | Burgenland    |
| 84  | W    | Welschriesling        | Conventional | 13 | Burgenland    |
| 85  | Rosé | Zweigelt              | Conventional | 13 | Lower Austria |
| 86  | W    | Grüner Veltliner      | Conventional | 13 | Lower Austria |
| 87  | W    | Grüner Veltliner      | Conventional | 13 | Lower Austria |
| 88  | W    | Grüner Veltliner      | Conventional | 13 | Lower Austria |
| 89  | W    | Grüner Veltliner      | Conventional | 14 | Lower Austria |
| 90  | W    | Grüner Veltliner      | Conventional | 13 | Lower Austria |
| 91  | W    | Traminer              | organic      | 13 | Burgenland    |
| 92  | W    | Cuvée                 | Conventional | 13 | Burgenland    |
| 93  | W    | Sauvignon blanc       | Conventional | 13 | Lower Austria |
| 94  | W    | Chardonnay            | Conventional | 13 | Lower Austria |
| 95  | W    | Neuburger             | Conventional | 13 | Burgenland    |
| 96  | W    | Grüner Veltliner      | organic      | 13 | Lower Austria |
| 97  | W    | Grüner Veltliner      | Conventional | 13 | Lower Austria |
| 98  | W    | Grüner Veltliner      | Conventional | 13 | Lower Austria |
| 99  | W    | Grüner Veltliner      | Conventional | 13 | Lower Austria |
| 100 | W    | Chardonnay            | Conventional | 13 | Lower Austria |
| 101 | W    | Chardonnay            | Conventional | 13 | Lower Austria |
| 102 | W    | Chardonnay            | Conventional | 13 | Lower Austria |

|     |   |                    |              |    |               |
|-----|---|--------------------|--------------|----|---------------|
| 103 | W | Chardonnay         | Conventional | 13 | Lower Austria |
| 104 | W | Chardonnay         | Conventional | 13 | Lower Austria |
| 105 | W | Chardonnay         | Conventional | 13 | Burgenland    |
| 106 | W | Chardonnay         | Conventional | 13 | Burgenland    |
| 107 | W | Grüner Veltliner   | Conventional | 13 | Lower Austria |
| 108 | W | Grüner Veltliner   | Conventional | 18 | Lower Austria |
| 109 | W | Grüner Veltliner   | Conventional | 18 | Lower Austria |
| 110 | W | Grüner Veltliner   | Conventional | 18 | Lower Austria |
| 111 | W | Grüner Veltliner   | Conventional | 18 | Lower Austria |
| 112 | W | Grüner Veltliner   | Conventional | 18 | Vienna        |
| 113 | W | Gemischter Satz    | Conventional | 18 | Lower Austria |
| 114 | W | Gelber Muskateller | Conventional | 18 | Lower Austria |
| 115 | W | Welschriesling     | Conventional | 18 | Lower Austria |
| 116 | W | Grüner Veltliner   | Conventional | 18 | Lower Austria |
| 117 | W | Gemischter Satz    | Conventional | 18 | Vienna        |
| 118 | W | Grüner Veltliner   | Conventional | 18 | Lower Austria |
| 119 | R | Zweigelt/ME        | Conventional | 17 | Lower Austria |
| 120 | R | Zweigelt/ME        | Conventional | 18 | Lower Austria |
| 121 | R | Zweigelt           | Conventional | 18 | Lower Austria |
| 122 | R | Zweigelt           | organic      | 18 | Lower Austria |
| 123 | W | Weißburgunder      | organic      | 17 | Lower Austria |
| 124 | R | Zweigelt           | Conventional | 16 | Lower Austria |
| 125 | W | Grüner Veltliner   | Conventional | 18 | Lower Austria |
| 126 | R | Zweigelt           | Conventional | 17 | Lower Austria |
| 127 | R | Merlot             | Conventional | 16 | Lower Austria |
| 128 | W | Grüner Veltliner   | Conventional | 17 | Lower Austria |
| 129 | W | Grüner Veltliner   | Conventional | 17 | Lower Austria |
| 130 | W | Grüner Veltliner   | Conventional | 17 | Lower Austria |
| 131 | W | Grüner Veltliner   | Conventional | 18 | Lower Austria |
| 132 | W | Grüner Veltliner   | organic      | 18 | Lower Austria |
| 133 | W | Grüner Veltliner   | Conventional | 18 | Lower Austria |
| 134 | W | Grüner Veltliner   | Conventional | 18 | Lower Austria |
| 135 | W | Grüner Veltliner   | Conventional | 15 | Lower Austria |
| 136 | W | Weißburgunder      | Conventional | 17 | Lower Austria |
| 137 | W | Chardonnay         | Conventional | 17 | Lower Austria |

|     |      |                    |              |    |               |
|-----|------|--------------------|--------------|----|---------------|
| 138 | W    | Grüner Veltliner   | Conventional | 17 | Lower Austria |
| 139 | W    | Gelber Muskateller | Conventional | 17 | Lower Austria |
| 140 | W    | Welschriesling     | Conventional | 17 | Lower Austria |
| 141 | W    | Weißburgunder      | Conventional | 18 | Lower Austria |
| 142 | W    | Weißburgunder      | Conventional | 18 | Lower Austria |
| 143 | W    | Weißburgunder      | Conventional | 18 | Lower Austria |
| 144 | W    | Weißburgunder      | Conventional | 18 | Lower Austria |
| 145 | W    | Weißburgunder      | Conventional | 18 | Lower Austria |
| 146 | W    | Weißburgunder      | Conventional | 18 | Lower Austria |
| 147 | W    | Grüner Veltliner   | Conventional | 17 | Lower Austria |
| 148 | W    | Grüner Veltliner   | Conventional | 17 | Lower Austria |
| 149 | W    | Weißburgunder      | Conventional | 17 | Vienna        |
| 150 | W    | Gelber Muskateller | Conventional | 17 | Lower Austria |
| 151 | Rosé | Syrah              | Conventional | 17 | Lower Austria |
| 152 | R    | Zweigelt           | Conventional | 16 | Lower Austria |
| 153 | W    | Grüner Veltliner   | Conventional | 17 | Lower Austria |
| 154 | W    | Grüner Veltliner   | Conventional | 17 | Lower Austria |
| 155 | R    | Zweigelt           | Conventional | 17 | Lower Austria |
| 156 | W    | Grüner Veltliner   | organic      | 17 | Lower Austria |
| 157 | W    | Grüner Veltliner   | Conventional | 17 | Lower Austria |
| 158 | W    | Welschriesling     | Conventional | 17 | Lower Austria |
| 159 | W    | Syrah              | Conventional | 17 | Lower Austria |
| 160 | R    | Zweigelt           | Conventional | 16 | Lower Austria |
| 161 | W    | Gelber Muskateller | Conventional | 17 | Lower Austria |
| 162 | W    | Weißburgunder      | Conventional | 17 | Lower Austria |
| 163 | W    | Welschriesling     | Conventional | 17 | Lower Austria |
| 164 | W    | Grüner Veltliner   | biodynamic   | 17 | Lower Austria |
| 165 | W    | Müller Thurgau     | Conventional | 17 | Lower Austria |
| 166 | W    | Chardonnay         | Conventional | 17 | Lower Austria |
| 167 | W    | Gelber Muskateller | Conventional | 17 | Lower Austria |
| 168 | W    | Grüner Veltliner   | organic      | 17 | Lower Austria |
| 169 | W    | Grüner Veltliner   | Conventional | 17 | Vienna        |
| 170 | W    | Gelber Muskateller | organic      | 17 | Lower Austria |
| 171 | W    | Sauvignon blanc    | Conventional | 17 | Vienna        |
| 172 | W    | Grüner Veltliner   | Conventional | 17 | Lower Austria |

|     |      |                    |              |    |               |
|-----|------|--------------------|--------------|----|---------------|
| 173 | W    | Rheinriesling      | Conventional | 17 | Vienna        |
| 174 | W    | Gemischter Satz    | Conventional | 17 | Vienna        |
| 175 | W    | Rheinriesling      | Conventional | 17 | Vienna        |
| 176 | W    | Grüner Veltliner   | Conventional | 17 | Lower Austria |
| 177 | W    | Müller Thurgau     | Conventional | 17 | Lower Austria |
| 178 | W    | Grüner Veltliner   | Conventional | 17 | Lower Austria |
| 179 | W    | Grüner Veltliner   | Conventional | 17 | Lower Austria |
| 180 | W    | Gelber Muskateller | organic      | 17 | Lower Austria |
| 181 | W    | Grüner Veltliner   | Conventional | 17 | Lower Austria |
| 182 | W    | Grüner Veltliner   | Conventional | 17 | Lower Austria |
| 183 | W    | Sauvignon blanc    | Conventional | 17 | Lower Austria |
| 184 | W    | Grüner Veltliner   | Conventional | 17 | Lower Austria |
| 185 | W    | Roter Veltliner    | Conventional | 17 | Lower Austria |
| 186 | W    | Syrah              | Conventional | 17 | Styria        |
| 187 | W    | Sauvignon blanc    | organic      | 17 | Lower Austria |
| 188 | W    | Grüner Veltliner   | Conventional | 17 | Lower Austria |
| 189 | W    | Grüner Veltliner   | Conventional | 17 | Lower Austria |
| 190 | W    | Chardonnay         | Conventional | 17 | Lower Austria |
| 191 | W    | Grüner Veltliner   | Conventional | 17 | Lower Austria |
| 192 | Rosé | Zweigelt           | Conventional | 17 | Lower Austria |
| 193 | R    | Zweigelt           | Conventional | 17 | Lower Austria |
| 194 | W    | Welschriesling     | Conventional | 17 | Lower Austria |
| 195 | W    | Weißburgunder      | Conventional | 17 | Styria        |
| 196 | W    | Grüner Veltliner   | Conventional | 17 | Lower Austria |
| 197 | R    | Sankt Laurent      | Conventional | 17 | Lower Austria |
| 198 | R    | Zweigelt           | Conventional | 15 | Lower Austria |
| 199 | R    | Cabernet Sauvignon | Conventional | 17 | Lower Austria |
| 200 | R    | Merlot             | Conventional | 17 | Lower Austria |
| 201 | R    | Zweigelt           | Conventional | 17 | Lower Austria |
| 202 | W    | Gemischter Satz    | Conventional | 17 | Lower Austria |
| 203 | W    | Rheinriesling      | organic      | 17 | Lower Austria |
| 204 | W    | Welschriesling     | Conventional | 17 | Lower Austria |
| 205 | W    | Grüner Veltliner   | Conventional | 17 | Lower Austria |
| 206 | W    | Welschriesling     | Conventional | 17 | Lower Austria |
| 207 | W    | Grüner Veltliner   | Conventional | 17 | Lower Austria |

|     |      |                        |              |    |               |
|-----|------|------------------------|--------------|----|---------------|
| 208 | W    | Grüner Veltliner       | Conventional | 17 | Lower Austria |
| 209 | W    | Grüner Veltliner       | Conventional | 17 | Lower Austria |
| 210 | W    | Chardonnay             | Conventional | 17 | Lower Austria |
| 211 | R    | Sankt Laurent          | Conventional | 16 | Lower Austria |
| 212 | Rosé | Blauburgunder          | Conventional | 17 | Lower Austria |
| 213 | W    | Chardonnay             | Conventional | 17 | Lower Austria |
| 214 | W    | Grüner Veltliner       | Conventional | 16 | Lower Austria |
| 215 | W    | Grüner Veltliner       | Conventional | 17 | Lower Austria |
| 216 | R    | Cuvée                  | Conventional | 17 | Lower Austria |
| 217 | R    | Blaufränkisch          | Conventional | 17 | Lower Austria |
| 218 | W    | Welschriesling         | Conventional | 17 | Lower Austria |
| 219 | W    | Rheinriesling          | Conventional | 17 | Lower Austria |
| 220 | W    | Zierfandler/Rotgipfler | Conventional | 17 | Lower Austria |
| 221 | W    | Zierfandler/Rotgipfler | Conventional | 17 | Lower Austria |
| 222 | W    | Rheinriesling          | organic      | 17 | Lower Austria |
| 223 | R    | Rösler                 | organic      | 15 | Lower Austria |
| 224 | W    | Grüner Veltliner       | Conventional | 17 | Lower Austria |
| 225 | W    | Chardonnay             | Conventional | 17 | Lower Austria |
| 226 | W    | Chardonnay             | Conventional | 17 | Lower Austria |
| 227 | W    | Grüner Veltliner       | Conventional | 17 | Lower Austria |
| 228 | W    | Grüner Veltliner       | Conventional | 17 | Lower Austria |
| 229 | W    | Sauvignon blanc        | Conventional | 17 | Styria        |
| 230 | W    | Grüner Veltliner       | Conventional | 17 | Lower Austria |
| 231 | R    | Zweigelt               | Conventional | 17 | Lower Austria |
| 232 | R    | Zweigelt               | Conventional | 17 | Lower Austria |
| 233 | R    | Cuvée                  | Conventional | 17 | Lower Austria |
| 234 | W    | Grüner Veltliner       | Conventional | 17 | Lower Austria |
| 235 | W    | Rheinriesling          | organic      | 17 | Lower Austria |
| 236 | R    | Merlot                 | Conventional | 16 | Lower Austria |
| 237 | W    | Grüner Veltliner       | Conventional | 17 | Lower Austria |
| 238 | Rosé | Zweigelt               | organic      | 17 | Lower Austria |
| 239 | W    | Sauvignon blanc        | Conventional | 17 | Lower Austria |
| 240 | R    | Zweigelt               | Conventional | 16 | Lower Austria |
| 241 | R    | Cabernet Sauvignon     | Conventional | 17 | Burgenland    |
| 242 | R    | Cabernet Sauvignon     | Conventional | 15 | Burgenland    |

|     |   |               |              |    |            |
|-----|---|---------------|--------------|----|------------|
| 243 | R | Merlot        | Conventional | 15 | Burgenland |
| 244 | R | Zweigelt      | Conventional | 15 | Burgenland |
| 245 | R | Blauburgunder | Conventional | 15 | Burgenland |
| 246 | R | Blaufränkisch | Conventional | 16 | Burgenland |
| 247 | R | Blaufränkisch | Conventional | 15 | Burgenland |
| 248 | R | Blaufränkisch | organic      | 16 | Burgenland |
| 249 | R | Blaufränkisch | biodynamic   | 15 | Burgenland |
| 250 | R | Blauburger    | Conventional | 17 | Burgenland |

---



**Table S2:** sample list (must and fermenting must: all conventional)

| Number | Colour | Cultivar           | Kind of product | Vintage | Origin        |
|--------|--------|--------------------|-----------------|---------|---------------|
| 1      | W      | Grüner Veltliner   | must            | 19      | Burgenland    |
| 2      | W      | Grüner Veltiner    | must            | 19      | Burgenland    |
| 3      | W      | Grüner Veltliner   | must            | 19      | Lower Austria |
| 4      | W      | Grüner Veltliner   | must            | 19      | Vienna        |
| 5      | W      | Welschriesling     | must            | 19      | Burgenland    |
| 6      | W      | Welschriesling     | must            | 19      | Styria        |
| 7      | W      | Welschriesling     | must            | 19      | Styria        |
| 8      | R      | Zweigelt           | must            | 19      | Burgenland    |
| 9      | R      | Zweigelt           | must            | 19      | Burgenland    |
| 10     | R      | Zweigelt           | must            | 19      | Burgenland    |
| 11     | R      | Zweigelt           | must            | 19      | Burgenland    |
| 12     | W      | Chardonnay         | must            | 19      | Burgenland    |
| 13     | W      | Cuvée              | must            | 19      | Burgenland    |
| 14     | W      | Gemischter Satz    | must            | 19      | Vienna        |
| 15     | W      | Chardonnay         | must            | 19      | Burgenland    |
| 16     | R      | Blauer Portugieser | must            | 19      | Lower Austria |
| 17     | R      | Blauer Portugieser | must            | 19      | Lower Austria |
| 18     | W      | Chardonnay         | must            | 19      | Burgenland    |
| 19     | W      | Cuvée              | must            | 19      | Burgenland    |
| 20     | R      | Blauer Portugieser | must            | 19      | Lower Austria |
| 21     | R      | Blauburger         | must            | 19      | Lower Austria |
| 22     | R      | Blauburger         | must            | 19      | Lower Austria |
| 23     | R      | Cuvée              | must            | 19      | Burgenland    |
| 24     | R      | Cuvée              | must            | 19      | Burgenland    |
| 25     | R      | Cuvée              | must            | 19      | Burgenland    |
| 26     | W      | Traminer           | must            | 19      | Lower Austria |
| 27     | W      | Chardonnay         | must            | 19      | Burgenland    |
| 28     | W      | Sauvignon blanc    | must            | 19      | Lower Austria |
| 29     | W      | Sauvignon blanc    | must            | 19      | Lower Austria |
| 30     | W      | Chardonnay         | must            | 19      | styria        |
| 31     | R      | Blauburger         | must            | 19      | Lower Austria |
| 32     | R      | Zweigelt           | must            | 19      | Burgenland    |
| 33     | W      | Zweigelt           | must            | 19      | Lower Austria |

|    |      |                          |                      |    |               |
|----|------|--------------------------|----------------------|----|---------------|
| 34 | Rosé | Cabernet Sauvignon       | must in fermentation | 19 | Lower Austria |
| 35 | W    | Welschriesling           | must in fermentation | 19 | Lower Austria |
| 36 | W    | Weißburgunder            | must in fermentation | 19 | Lower Austria |
| 37 | W    | Grüner Veltliner         | must in fermentation | 19 | Lower Austria |
| 38 | W    | Grüner Veltliner         | must in fermentation | 19 | Lower Austria |
| 39 | W    | Grüner Veltliner         | must in fermentation | 19 | Burgenland    |
| 40 | W    | Grüner Veltliner         | must in fermentation | 19 | Burgenland    |
| 41 | W    | Weißburgunder            | must in fermentation | 19 | Burgenland    |
| 42 | W    | Chardonnay               | must in fermentation | 19 | Burgenland    |
| 43 | W    | Chardonnay               | must in fermentation | 19 | Burgenland    |
| 44 | W    | Sauvignon blanc          | must in fermentation | 19 | Lower Austria |
| 45 | W    | Viennaer Gemischter Satz | must in fermentation | 19 | Lower Austria |
| 46 | W    | Rotgipfler               | must in fermentation | 19 | Vienna        |
| 47 | W    | Grüner Veltliner         | must in fermentation | 19 | Lower Austria |
| 48 | W    | Grüner Veltliner         | must in fermentation | 19 | Burgenland    |
| 49 | W    | Welschriesling           | must in fermentation | 19 | Burgenland    |
| 50 | W    | Welschriesling           | must in fermentation | 19 | Lower Austria |
| 51 | W    | Welschriesling           | must in fermentation | 19 | Burgenland    |
| 52 | W    | Grüner Veltliner DAC     | must in fermentation | 19 | Vienna        |
| 53 | W    | Chardonnay               | must in fermentation | 19 | Lower Austria |
| 54 | W    | Chardonnay               | must in fermentation | 19 | Burgenland    |
| 55 | W    | Chardonnay               | must in fermentation | 19 | Burgenland    |

|    |   |                    |                      |    |               |
|----|---|--------------------|----------------------|----|---------------|
| 56 | W | Grüner Veltliner   | must in fermentation | 19 | Lower Austria |
| 57 | W | Chardonnay         | must in fermentation | 19 | Lower Austria |
| 58 | W | Sauvignon blanc    | must in fermentation | 19 | Styria        |
| 59 | W | Sauvignon blanc    | must in fermentation | 19 | Styria        |
| 60 | W | Sauvignon blanc    | must in fermentation | 19 | Styria        |
| 61 | W | Rheinriesling      | must in fermentation | 19 | Lower Austria |
| 62 | W | Grüner Veltliner   | must in fermentation | 19 | Lower Austria |
| 63 | W | Grüner Veltliner   | must in fermentation | 19 | Lower Austria |
| 64 | W | Gemischter Satz    | must in fermentation | 19 | Lower Austria |
| 65 | W | Gemischter Satz    | must in fermentation | 19 | Lower Austria |
| 66 | W | Grüner Veltliner   | must in fermentation | 19 | Lower Austria |
| 67 | R | Zweigelt           | must in fermentation | 19 | Burgenland    |
| 68 | R | Zweigelt           | must in fermentation | 19 | Lower Austria |
| 69 | R | Blauer Portugieser | must in fermentation | 19 | Lower Austria |
| 70 | R | Syrah              | must in fermentation | 19 | Burgenland    |
| 71 | W | Chardonnay         | must in fermentation | 19 | Burgenland    |
| 72 | W | Cuvée              | must in fermentation | 19 | Burgenland    |
| 73 | W | Cuvée              | must in fermentation | 19 | Lower Austria |
| 74 | R | Zweigelt           | must in fermentation | 19 | Burgenland    |
| 75 | R | Blauburger         | must in fermentation | 19 | Burgenland    |
| 76 | R | Pinot Noir         | must in fermentation | 19 | Lower Austria |
| 77 | R | Merlot             | must in fermentation | 19 | Lower Austria |

78

W

Chardonnay

must in  
fermentation

19

Lower Austria

---

**Table S3:** Calibration and validation data of the pesticide method

| Compound Name       | RT [min] | MS-Ms Transitions (m/z) Lehotay et al.*1 | CE (V)         | R^2    | Recovery [%] WW | Recovery [%] RW | Intraday repeatability [% RSD] | LOD [µg/l] | LOQ [µg/l] |
|---------------------|----------|------------------------------------------|----------------|--------|-----------------|-----------------|--------------------------------|------------|------------|
| Pirimethanil        | 16,16    | 198 → 183<br>198 → 158<br>198 → 118      | 15<br>20<br>35 | 0,9991 | 62,5            | 60,1            | 12,4                           | 2,4        | 11,7       |
| Chlorpyrifos-methyl | 18,11    | 286 → 93<br>125 → 47<br>79 → 47          | 25<br>15<br>10 | 0,9970 | 92,7            | 70,1            | 28,8                           | 1,7        | 8,4        |
| Metalaxyl           | 18,64    | 234 → 146<br>234 → 174<br>220 → 192      | 10<br>20<br>5  | 0,9954 | 85,7            | 86,2            | 19,7                           | 1,5        | 7,4        |
| Chlorpyrifos        | 19,99    | 199 → 171<br>314 → 258<br>197 → 169      | 15<br>15<br>15 | 0,9998 | 75,9            | 78,6            | 5,5                            | 3,7        | 18,1       |
| Cyprodinil          | 20,90    | 224 → 208<br>226 → 225<br>225 → 224      | 10<br>10<br>20 | 0,9975 | 67,1            | 64,9            | 17,2                           | 2,2        | 10,8       |
| Penconazol          | 21,22    | 248 → 192<br>248 → 157<br>159 → 89       | 15<br>25<br>35 | 0,9991 | 98,9            | 110,7           | 8,9                            | 2,8        | 14,0       |
| Fluopyram           | 21,64    | 173 → 125<br>173 → 145                   | 25<br>25       | 0,9963 | 96,9            | 101,0           | 6,1                            | 2,0        | 10,0       |
| Folpet              | 21,67    | 260 → 232<br>262 → 130<br>260 → 130      | 15<br>5<br>15  | 0,9962 | 82,2            | 88,5            | 11,9                           | 3,3        | 16,2       |
| Mepanipyrim         | 22,60    | 221 → 220<br>223 → 222<br>222 → 207      | 10<br>15<br>15 | 0,9977 | 82,7            | 92,1            | 14,8                           | 0,8        | 4,0        |
| Napropamid          | 22,96    | 128 → 72<br>271 → 72<br>128 → 100        | 15<br>10<br>5  | 0,9972 | 93,1            | 101,9           | 9,8                            | 1,9        | 9,4        |
| Fludioxonil         | 23,39    | 248 → 182<br>248 → 154<br>248 → 127      | 10<br>20<br>30 | 0,9948 | 85,4            | 86,8            | 9,6                            | 1,8        | 8,7        |
| Myclobutanil        | 23,73    | 179 → 90<br>179 → 125<br>150 → 123       | 10<br>30<br>15 | 0,9952 | 104,9           | 85,6            | 9,3                            | 2,4        | 11,9       |

|                 |       |                                     |                |        |       |       |      |     |      |
|-----------------|-------|-------------------------------------|----------------|--------|-------|-------|------|-----|------|
| Kresoxim-methyl | 24,07 | 116 → 63<br>131 → 89<br>116 → 89    | 30<br>15<br>30 | 0,9967 | 82,5  | 79,7  | 9,6  | 2,7 | 13,3 |
| Cyflufenamid    | 24,40 | 118 → 90<br>188 → 88<br>118 → 89    | 35<br>10<br>25 | 0,9988 | 76,3  | 79,5  | 12,2 | 2,3 | 11,0 |
| Benalaxyl       | 25,98 | 148 → 105<br>266 → 148<br>148 → 105 | 5<br>20<br>35  | 0,9944 | 83,0  | 72,9  | 13,0 | 2,5 | 12,5 |
| Quinoxifen      | 26,04 | 272 → 237<br>307 → 237<br>237 → 208 | 20<br>10<br>20 | 0,9950 | 116,3 | 118,9 | 5,5  | 1,8 | 8,9  |
| Fenhexamid      | 26,19 | 177 → 113<br>97 → 78<br>172 → 145   | 15<br>25<br>10 | 0,9371 | 91,2  | 80,7  | 16,0 | 2,0 | 9,7  |
| Trifloxystrobin | 26,48 | 116 → 63<br>172 → 145<br>116 → 89   | 15<br>15<br>30 | 0,9962 | 76,9  | 84,6  | 9,1  | 2,1 | 10,3 |
| Tebuconazol     | 26,75 | 125 → 99<br>250 → 125<br>125 → 89   | 20<br>20<br>15 | 0,9956 | 87,6  | 73,7  | 19,8 | 2,3 | 11,5 |
| TPP IST         | 27,04 | 233 → 215<br>326 → 325<br>215 → 168 | 5<br>10<br>15  | IST    |       |       |      |     |      |
| Fenpyrazamin    | 30,60 | 230 → 188<br>230 → 160<br>230 → 132 | 5<br>10<br>15  | 0,9947 | 92,0  | 95,9  | 11,7 | 1,9 | 9,6  |
| Boscalid        | 33,36 | 140 → 76<br>140 → 112<br>112 → 76   | 10<br>25<br>15 | 0,9964 | 79,0  | 82,6  | 14,2 | 2,2 | 10,6 |
| Cypermethrin    | 33,49 | 163 → 127<br>165 → 91<br>163 → 91   | 15<br>5<br>15  | 0,9986 | 72,2  | 84,4  | 10,9 | 2,1 | 10,3 |
| Indoxacarb      | 36,51 | 203 → 106<br>203 → 134<br>203 → 78  | 15<br>25<br>30 | 0,9999 | 81,7  | 77,4  | 8,8  | 1,7 | 8,4  |

\*1 Lehotay, S. J.; Kok, A. D.; Hiemstra, M.; Bodegraven, P. V. Validation of a fast and easy method for the determination of residues from 229 pesticides in fruits and vegetables using gas and liquid chromatography and mass spectrometric detection. *J. AOAC Int.* **2005.**, 88(2), 595–614.

**Table S4.** Information concerning calibration and validation of the volatile compound.

| <b>Volatile substance (µg/L)</b> | <b>Meth od</b> | <b>abbrevi ation</b> | <b>Quantif ier</b> | <b>Qualif ier</b> | <b>Internal standard</b> | <b>calibration area</b> | <b>linearity</b> | <b>RI</b> | <b>reference RI</b> | <b>repeatability</b> | <b>LOQ</b> | <b>LOD</b> |
|----------------------------------|----------------|----------------------|--------------------|-------------------|--------------------------|-------------------------|------------------|-----------|---------------------|----------------------|------------|------------|
| (Z)-linalool oxide               | FM             | FM1                  | 59                 | 94, 111           | 3,4-dimethylanisole      | 0.9-174.3               | 0.998            | 1 070     | 1065-1098 a         | 5.8 %                | 0.87       | 0.26       |
| (E)-linalool oxide               | FM             | FM2                  | 59                 | 94, 111           | 3,4-dimethylanisole      | 0.9-175.7               | 0.998            | 1 087     | 1065-1098 a         | 6.0 %                | 0.88       | 0.26       |
| linalool                         | FM             | FM3                  | 71                 | 93, 67            | 3,4-dimethylanisole      | 0.8-160                 | 0.998            | 1 101     | 1074-1112 a         | 7.0 %                | 0.80       | 0.24       |
| hotrienol                        | FM             | FM4                  | 71                 | 82, 67            | 3,4-dimethylanisole      | 0.5-108.1               | 0.999            | 1 104     | 1101-1109 a         | 5.7 %                | 0.54       | 0.16       |
| (Z)-rose oxide                   | FM             | FM5                  | 139                | 69, 154           | 3,4-dimethylanisole      | 0.6-113.2               | 0.998            | 1 110     | 1097-1121 a         |                      | 0.57       | 0.17       |
| (E)-rose oxide                   | FM             | FM6                  | 139                | 69, 154           | 3,4-dimethylanisole      | 0.1-10.8                | 0.999            | 1 123     |                     |                      | 0.05       | 0.02       |
| (E)-limonene oxide               | FM             | FM7                  | 94                 | 67, 109           | 3,4-dimethylanisole      | 0.8-153.9               | 0.998            | 1 132     |                     |                      | 0.77       | 0.23       |
| beta-terpineol                   | FM             | FM8                  | 93                 | 121, 136          | 3,4-dimethylanisole      | 0.1-11.8                | 0.997            | 1 144     | 1127-1188 a         |                      | 0.06       | 0.02       |
| nerol oxide                      | FM             | FM9                  | 68                 | 83                | 3,4-dimethylanisole      | 0.6-118.0               | 0.998            | 1 146     | 1137-1172 a         | 4.1 %                | 0.59       | 0.18       |
| lavandulol                       | FM             | FM10                 | 69                 | 111, 123          | 3,4-dimethylanisole      | 0.7-147.0               | 0.998            | 1 160     | 1140-1185 a         | 15.3 %               | 0.74       | 0.22       |
| alpha-terpineol                  | FM             | FM11                 | 93                 | 121, 136          | 3,4-dimethylanisole      | 0.4-86.0                | 0.998            | 1 194     | 1150-1224 a         | 13.3 %               | 0.40       | 0.12       |
| gamma-terpineol                  | FM             | FM12                 | 121                | 136, 93           | 3,4-dimethylanisole      | 0.1-28.4                | 0.997            | 1 198     | 1177-1218 a         |                      | 0.14       | 0.04       |
| nerol                            | FM             | FM13                 | 69                 | 93, 95            | 3,4-dimethylanisole      | 0.7-134.0               | 0.998            | 1 228     | 1204-1254 a         | 16.5 %               | 0.67       | 0.20       |
| citronellol                      | FM             | FM14                 | 69                 | 95, 93            | 3,4-dimethylanisole      | 0.7-148.0               | 0.998            | 1 229     | 1206-1238 a         | 12.2 %               | 0.74       | 0.22       |
| geraniol                         | FM             | FM15                 | 69                 | 93, 123           | 3,4-dimethylanisole      | 0.7-131.0               | 0.998            | 1 256     | 1221-1277 a         | 4.8 %                | 0.66       | 0.20       |

|                          |     |       |     |        |                    |              |       |      |             |        |            |       |
|--------------------------|-----|-------|-----|--------|--------------------|--------------|-------|------|-------------|--------|------------|-------|
| 1-propanol (mg/L)        | MV  | HA1   | 31  | 42     | d10-butanol        | 0.09-496.01  | 0.999 | 1035 | 1002-1073 b | 8.2 %  | 0.010      | 0.003 |
| isobutanol (mg/L)        | MV  | HA2   | 42  | 31     | d10-butanol        | 0.91-91.79   | 0.999 | 1088 | 1043-1124 b | 5.7 %  | 0.918      | 0.275 |
| isoamyl alcohol (mg/L)   | MV  | HA3   | 70  | 43     | d10-butanol        | 10.42-521.24 | 0.999 | 1206 | 1163-1255 b | 7.8 %  | 10.42<br>5 | 3.127 |
| 1-butanol (mg/L)         | MV  | HA4   | 56  | 41     | d10-butanol        | 0.06-2.79    | 0.998 | 1142 | 1110-1179 b | 7.6 %  | 0.063      | 0.019 |
| (Z)-3-hexen-1-ol (mg/L)  | MV  | C6-1  | 82  | 67, 55 | d5-ethyl hexanoate | 0.01-0.20    | 0.999 | 1371 | 1346-1426 b | 11.0 % | 0.010      | 0.003 |
| 1-hexanol (mg/L)         | MV  | C6-26 | 69  | 55     | d13-hexanol        | 0.01-6.48    | 0.998 | 1352 | 1314-1396 b | 2.8 %  | 0.013      | 0.004 |
| ethyl acetate (mg/L)     | MV  | EE1   | 61  | 43     | d5-ethyl octanoate | 9.83-196.57  | 0.999 | 892  | 854-914 b   | 7.0 %  | 9.829      | 2.949 |
| ethyl lactate (mg/L)     | MV  | EE2   | 45  | 75     | d5-ethyl octanoate | 0.10-51.78   | 0.998 | 1335 | 1316-1353 b | 6.5 %  | 0.104      | 0.031 |
| ethyl propanoate (mg/L)  | MV  | EE3   | 57  | 75     | d5-ethyl hexanoate | 9.80-980.00  | 0.998 | 952  | 915-976 b   | 10.6 % | 0.010      | 0.003 |
| diethyl succinate (mg/L) | MV  | MiE1  | 101 | 129    | d5-ethyl octanoate | 0.1-9.9      | 0.997 | 1668 | 1658-1714 b | 11.3 % | 0.099      | 0.030 |
| ethyl butanoate          | MME | EE4   | 71  | 88, 43 | d5-ethyl valerate  | 12.5-2500.0  | 0.998 | 802  | 770-818 a   | 3.4 %  | 12.50      | 3.75  |
| ethyl isovalerate        | MME | EE5   | 88  | 85, 57 | d5-ethyl valerate  | 0.3-49.8     | 0.998 | 852  | 824-859 a   | 3.3 %  | 0.25       | 0.07  |
| ethyl valerate           | MME | EE6   | 85  | 88, 57 | d5-ethyl valerate  | 0.1-10.4     | 0.998 | 901  | 871-929 a   | 4.4 %  | 0.13       | 0.04  |
| ethyl hexanoate          | MME | EE7   | 88  | 99, 43 | d5-ethyl hexanoate | 13.2-2641.0  | 0.999 | 1001 | 976-1014 a  | 3.1 %  | 13.21      | 3.96  |
| ethyl heptanoate         | MME | EE8   | 88  | 113    | d5-ethyl valerate  | 0.1-10.5     | 0.999 | 1098 | 1080-1099 a | 3.9 %  | 0.05       | 0.02  |



|                       |     |       |     |             |                    |             |       |      |             |        |       |      |
|-----------------------|-----|-------|-----|-------------|--------------------|-------------|-------|------|-------------|--------|-------|------|
| ethyl octanoate       | MME | EE9   | 88  | 101,<br>127 | d5-ethyl octanoate | 16.4-3280.0 | 0.999 | 1202 | 1173-1202 a | 2.6 %  | 16.40 | 4.92 |
| ethyl decanoate       | MME | EE10  | 88  | 101         | d5-ethyl decanoate | 16.9-3385.8 | 0.999 | 1399 | 1367-1405 a | 8.2 %  | 16.93 | 5.08 |
| ethyl dodecanoate     | MME | EE11  | 88  | 101,<br>157 | d5-ethyl decanoate | 0.3-50.8    | 0.998 | 1595 | 1566-1596 a | 15.7 % | 0.25  | 0.08 |
| ethyl tetradecanoate  | MME | EE12  | TIC | TIC         | d5-ethyl decanoate | 0.3-49.9    | 0.998 | 1795 | 1769-1799 a | 11.9 % | 0.25  | 0.07 |
| ethyl hexadecanoate   | MME | EE13  | 88  | 101,<br>157 | d5-ethyl decanoate | 3.9-55.9    | 0.998 | 1990 | 1966-2013 a | 13.0 % | 3.92  | 1.18 |
| methyl isovalerate    | MME | ME1   | 74  | 85, 57      | d5-ethyl valerate  | 0.1-10.4    | 0.999 | 774  | 766-778 a   |        | 0.05  | 0.02 |
| methyl hexanoate      | MME | ME2   | 74  | 87, 43      | d5-ethyl valerate  | 0.1-10.6    | 0.999 | 924  | 902-931 a   | 3.9 %  | 0.05  | 0.02 |
| methyl octanoate      | MME | ME3   | 74  | 87, 127     | d5-ethyl hexanoate | 0.1-8.7     | 0.999 | 1124 | 1105-1138 a | 6.6 %  | 0.04  | 0.01 |
| methyl decanoate      | MME | ME4   | 74  | 87, 143     | d5-ethyl octanoate | 0.1-10.6    | 0.999 | 1325 | 1304-1329 a | 5.9 %  | 0.05  | 0.02 |
| methyl dodecanoate    | MME | ME5   | 74  | 87, 143     | d5-ethyl decanoate | 0.2-41.9    | 0.998 | 1525 | 1503-1527 a |        | 0.21  | 0.06 |
| methyl tetradecanoate | MME | ME6   | 74  | 87, 143     | d5-ethyl decanoate | 0.2-48.6    | 0.998 | 1727 | 1699-1738 a |        | 0.24  | 0.07 |
| isoamyl acetate       | MME | ISAE1 | 43  | 70          | d5-ethyl valerate  | 1.0-11.6    | 0.996 | 877  | 851-885 a   | 4.1 %  | 0.98  | 0.29 |
| isoamyl butanoate     | MME | ISAE2 | 71  | 70, 43      | d5-ethyl hexanoate | 0.1-9.6     | 0.999 | 1057 | 1041-1086 a | 7.2 %  | 0.05  | 0.01 |
| isoamyl isovalerate   | MME | ISAE3 | 85  | 70          | d5-ethyl octanoate | 0.1-9.2     | 0.998 | 1105 | 1081-1105 a |        | 0.05  | 0.01 |

|                         |     |       |     |         |                    |             |       |      |             |        |       |      |
|-------------------------|-----|-------|-----|---------|--------------------|-------------|-------|------|-------------|--------|-------|------|
| isoamyl hexanoate       | MME | ISAE4 | 70  | 43, 99  | d5-ethyl octanoate | 0.1-10      | 0.997 | 1254 | 1238-1254 a | 5.9 %  | 0.05  | 0.02 |
| isoamyl octanoate       | MME | ISAE5 | 70  | 127     | d5-ethyl octanoate | 0.1-10.1    | 0.997 | 1448 | 1450 a      | 13.8 % | 0.05  | 0.02 |
| ethyl benzoate          | MME | ArE1  | 105 | 122     | d5-ethyl hexanoate | 0.1-14.3    | 0.999 | 1173 | 1138-1206 a | 6.3 %  | 0.07  | 0.02 |
| ethyl phenylacetate     | MME | ArE2  | 91  | 91      | d5-ethyl octanoate | 0.1-13.0    | 0.996 | 1244 | 1209-1251 a | 9.5 %  | 0.07  | 0.02 |
| isobutyl acetate        | MME | HAA1  | 43  | 56      | d5-ethyl valerate  | 12.7-2540.0 | 0.998 | 771  | 741-788 a   | 8.3 %  | 12.70 | 3.81 |
| 2-methylbutyl acetate   | MME | HAA2  | 43  | 70      | d5-ethyl valerate  | 13.4-2680.0 | 0.997 | 878  | 863-892 a   | 3.7 %  | 13.40 | 4.02 |
| hexyl acetate           | MME | HAA3  | 43  | 56, 61  | d5-ethyl hexanoate | 13.2-2630.0 | 0.999 | 1013 | 987-1025 a  | 3.2 %  | 13.15 | 3.95 |
| isobutyl propionate     | MME | MiE2  | 57  | 29      | d5-ethyl valerate  | 0.3-52.1    | 0.998 | 866  | 843-866 a   | 8.3 %  | 0.26  | 0.08 |
| butyl isobutanoate      | MME | MiE3  | 43  | 71      | d5-ethyl hexanoate | 1.0-11.0    | 0.999 | 953  | 952-955 a   | 9.5 %  | 0.98  | 0.30 |
| pentyl butanoate        | MME | MiE4  | 43  | 71, 70  | d5-ethyl hexanoate | 0.1-10.8    | 0.999 | 1095 | 1062-1098 a | 12.1 % | 0.05  | 0.02 |
| hexyl 2-methylbutanoate | MME | MiE5  | 99  | 56, 117 | d5-ethyl hexanoate | 0.1-10.2    | 0.999 | 1237 | 1204-1247 a |        | 0.05  | 0.02 |
| propyl isovalerate      | MME | MiE6  | 85  | 103     | d5-ethyl hexanoate | 0.1-10.0    | 0.998 | 950  | 928-951 a   |        | 0.05  | 0.02 |
| butyl butanoate         | MME | MiE7  | 71  | 88      | d5-ethyl hexanoate | 13.0-2600.0 | 0.999 | 996  | 969-996 a   | 0.9 %  | 13.00 | 3.90 |
| propyl octanoate        | MME | MiE8  | 145 | 127, 61 | d5-ethyl octanoate | 0.1-10.4    | 0.997 | 1292 | 1290 a      | 4.8 %  | 0.05  | 0.02 |
| isobutyl octanoate      | MME | MiE9  | 57  | 56      | d5-ethyl decanoate | 0.1-9.8     | 0.998 | 1349 | 1348-1370 a | 14.9 % | 0.05  | 0.01 |

(Data in empty fields could not be collected because it was not available or not detectable in the validation wine.)

a Kovats RI according to the RI calculation of Van Den Dool and Kratz, non-polar column, temperature ramp + custom temperature program (@nist database: <https://webbook.nist.gov/chemistry/>)  
b Kovats RI

according to the RI calculation of Van Den Dool and Kratz, polar column, temperature ramp + custom temperature program (@nist database: <https://webbook.nist.gov/chemistry/>)

FM=method for free monoterpenes, MV=method for main volatile substances, MME=method for major and minor esters, NOR=method for C13-norisoprenoids, MP=method for methoxypyrazines, OV=method for volatile phenols, oak volatiles, lactones and some carbonyl compounds

**Table S5:** volatile profiles of the white wines before and after fining

[illegible]

|                        | ohne<br>Mittel | Absolut | Reskue   | CarboTec | NaCalit  | Purity D | Flowpure | Grandeco | Granucol |          |
|------------------------|----------------|---------|----------|----------|----------|----------|----------|----------|----------|----------|
| alpha-Terpineol (µg/l) | 6,1a           |         | 5,6b     | 6,1a     | 6,1a     | 5,5b     | 5,8ab    | 5,6b     | 4,3c     | 5,8ab    |
| gamma-Terpineol (µg/l) | <0,14          |         | <0,14    | <0,14    | <0,14    | <0,14    | <0,14    | <0,14    | <0,14    | <0,14    |
| Nerol (µg/l)           | 2,2a           |         | 1,7cd    | 2,3a     | 2,2a     | 2,0ab    | 2,2a     | 1,8bc    | 1,5d     | 1,5d     |
| Citronellol (µg/l)     | 0,7a           |         | 0,7a     | 0,7a     | 0,7ab    | 0,6ab    | 0,7ab    | 0,7ab    | 0,5b     | 0,6ab    |
| Geraniol (µg/l)        | 11,5a          |         | 11,1a    | 11,5a    | 11,3a    | 8,9bc    | 9,6b     | 9,7b     | 8,2c     | 8,7bc    |
| Higher Alcohols        |                |         |          |          |          |          |          |          |          |          |
| Propanol1 (mg/l)       | 23,83a         |         | 22,17abc | 22,67abc | 22,93ab  | 20,43c   | 20,57bc  | 21,93abc | 20,63bc  | 22,55abc |
| Isobutanol (mg/l)      | 25,17a         |         | 23,67bc  | 24,90ab  | 24,20abc | 23,53bc  | 24,23abc | 23,37c   | 23,50bc  | 24,75abc |
| Isoamylalkohol (mg/l)  | 120,37a        |         | 117,07a  | 118,93a  | 120,17a  | 120,40a  | 121,67a  | 119,83a  | 119,73a  | 122,60a  |
| Butanol 1 (mg/l)       | 0,20a          |         | 0,20a    |
| C6-alcohols            |                |         |          |          |          |          |          |          |          |          |
| cis-3-Hexen-1ol (mg/l) | 0,01a          |         | 0,01a    |
| 1-Hexanol (mg/l)       | 0,50a          |         | 0,50a    | 0,50a    | 0,50a    | 0,50a    | 0,49a    | 0,50a    | 0,48a    | 0,49a    |
| Major ethyl esters     |                |         |          |          |          |          |          |          |          |          |
| ethyl acetate (mg/l)   | 21,23a         |         | 21,03a   | 20,90ab  | 20,47ab  | 20,87ab  | 19,77b   | 20,80ab  | 20,17ab  | 20,83ab  |

|                             | ohne<br>Mittel | Absolut | Reskue   | CarboTec | NaCalit | Purity D | Flowpure | Grandeco | Granucol |
|-----------------------------|----------------|---------|----------|----------|---------|----------|----------|----------|----------|
| ethyl lactate<br>(mg/l)     | 4,70a          | 4,37ab  | 3,40e    | 3,97bcd  | 4,07bc  | 3,53de   | 3,83cde  | 3,70cde  | 3,60de   |
| ethyl propanoate<br>(mg/l)  | 0,13a          | 0,10a   | 0,10a    | 0,10a    | 0,10a   | 0,10a    | 0,10a    | 0,10a    | 0,10a    |
| diethyl succinate<br>(mg/l) | 1,07a          | 0,90b   | 1,00a    | 0,80c    | 0,90b   | 1,00a    | 1,00a    | 1,00a    | 0,83a    |
| Minor ethyl esters          |                |         |          |          |         |          |          |          |          |
| ethyl butanoate<br>(µg/l)   | 373,8a         | 343,0b  | 348,1b   | 346,5b   | 369,2a  | 310,7d   | 369,1a   | 367,3a   | 322,5c   |
| ethyl isovalerate<br>(µg/l) | 5,5a           | 5,2a    | 4,7b     | 4,8b     | 5,4a    | 4,7b     | 5,3a     | 5,2a     | 4,6b     |
| ethyl valerate<br>(µg/l)    | 0,5a           | 0,5a    | 0,5a     | 0,5a     | 0,5a    | 0,4b     | 0,5a     | 0,5a     | 0,5a     |
| ethyl hexanoate<br>(µg/l)   | 633,1          | 591,8ab | 557,4ab  | 580,6ab  | 628,5a  | 511,8bc  | 616,1a   | 531,0b   | 453,8c   |
| ethyl heptanoate<br>(µg/l)  | 0,8a           | 0,2d    | 0,8a     | 0,7ab    | 0,7ab   | 0,5c     | 0,7ab    | 0,7ab    | 0,6bc    |
| ethyl octanoate<br>(µg/l)   | 1788,3a        | 1498,0c | 1591,7bc | 1533,0c  | 1777,9a | 1351,4d  | 1635,7b  | 1363,0d  | 1194,7e  |
| ethyl decanoate<br>(µg/l)   | 1189,0a        | 889,7d  | 831,0d   | 848,4d   | 1203,7a | 676,0e   | 1055,2b  | 972,3c   | 707,4e   |
| ethyl dodecanoate<br>(µg/l) | 63,0a          | 59,0ab  | 47,6c    | 55,5abc  | 61,6ab  | 54,1bc   | 60,2ab   | 53,8bc   | 27,5d    |

|                                    | ohne<br>Mittel | Absolut  | Reskue   | CarboTec | NaCalit | Purity D | Flowpure | Grandeco | Granucol |
|------------------------------------|----------------|----------|----------|----------|---------|----------|----------|----------|----------|
| ethyl<br>tetradecanoate<br>(µg/l)  | 11,3a          | 4,3f     | 6,0d     | 7,4c     | 10,2b   | 7,9c     | 5,6de    | 4,6ef    | 3,1g     |
| ethyl<br>hexadecanoate<br>(µg/l)   | 36,9a          | 22,3c    | 33,9ab   | 32,6ab   | 34,4ab  | 30,0b    | 32,7ab   | 30,4b    | 7,8d     |
| <b>Methyl esters</b>               |                |          |          |          |         |          |          |          |          |
| methyl isovalerate<br>(µg/l)       | <0,05          | <0,05    | <0,05    | <0,05    | <0,05   | <0,05    | <0,05    | <0,05    | <0,05    |
| methyl hexanoate<br>(µg/l)         | 1,7a           | 1,6a     | 1,6a     | 1,5a     | 1,7a    | 1,3a     | 1,7a     | 1,6a     | 1,5a     |
| methyl octanoate<br>(µg/l)         | 1,3a           | 1,1b     | 1,1b     | 1,1b     | 1,3a    | 1,0bc    | 1,1b     | 1,1b     | 0,9c     |
| methyl decanoate<br>(µg/l)         | 0,8a           | 0,8ab    | 0,8ab    | 0,7b     | 0,8a    | 0,7ab    | 0,8ab    | 0,7ab    | 0,8ab    |
| methyl<br>dodecanoate<br>(µg/l)    | n.d.           | n.d.     | n.d.     | n.d.     | n.d.    | n.d.     | n.d.     | n.d.     | n.d.     |
| methyl<br>tetradecanoate<br>(µg/l) | n.d.           | n.d.     | n.d.     | n.d.     | n.d.    | n.d.     | n.d.     | n.d.     | n.d.     |
| <b>Isoamyl esters</b>              |                |          |          |          |         |          |          |          |          |
| isoamyl acetate<br>(µg/l)          | 2468,7a        | 2306,2bc | 2253,0bc | 2206,7c  | 2459,2a | 2049,4d  | 2369,8ab | 2310,1bc | 2074,4d  |

|                                  | ohne<br>Mittel | Absolut | Reskue   | CarboTec | NaCalit  | Purity D | Flowpure | Grandeco | Granucol |
|----------------------------------|----------------|---------|----------|----------|----------|----------|----------|----------|----------|
| isoamyl butanoate<br>(µg/l)      | 0,1a           | 0,1a    | 0,1a     | 0,1a     | 0,1a     | 0,1a     | 0,1a     | 0,1a     | 0,1a     |
| isoamyl<br>isovalerate (µg/l)    | <0,05          | <0,05   | <0,05    | <0,05    | <0,05    | <0,05    | <0,05    | <0,05    | <0,05    |
| isoamyl hexanoate<br>(µg/l)      | 2,3a           | 2,2a    | 2,0b     | 2,2ab    | 2,3a     | 2,2ab    | 2,3a     | 2,2a     | 2,3a     |
| isoamyl octanoate<br>(µg/l)      | 2,4a           | 2,1bc   | 1,9c     | 1,6d     | 2,4a     | 2,1bc    | 2,3ab    | 2,2ab    | 1,6d     |
| <b>Aromatic esters</b>           |                |         |          |          |          |          |          |          |          |
| ethyl benzoate<br>(µg/l)         | 0,1a           | 0,1a    | 0,1a     | 0,1a     | 0,1a     | 0,1a     | 0,1a     | 0,1a     | 0,1a     |
| ethyl<br>phenylacetate<br>(µg/l) | 1,4a           | 0,9d    | 1,1c     | 1,2b     | 1,3b     | 0,8d     | 1,1c     | 0,9d     | 0,9d     |
| <b>Higher alcohol acetate</b>    |                |         |          |          |          |          |          |          |          |
| isobutyl acetate<br>(µg/l)       | 108,0a         | 98,2bcd | 100,1bcd | 97,0cd   | 103,2abc | 98,6bcd  | 105,6ab  | 104,7abc | 93,9d    |
| 2-methylbutyl<br>acetate (µg/l)  | 317,9a         | 303,6bc | 291,2de  | 286,9e   | 313,3ab  | 267,6f   | 298,7cd  | 297,7cd  | 248,5g   |
| hexyl acetate<br>(µg/l)          | 214,8a         | 194,2bc | 190,0c   | 182,5cd  | 211,7a   | 172,5de  | 205,7ab  | 160,8e   | 160,3e   |



| Miscellaneous minor esters     |       |        |        |        |        |       |        |        |        |
|--------------------------------|-------|--------|--------|--------|--------|-------|--------|--------|--------|
| isobutyl propionate (µg/l)     | 19,6a | 19,1ab | 18,9ab | 17,9bc | 19,2ab | 17,1c | 18,5ab | 19,2ab | 18,7ab |
| butyl isobutanoate (µg/l)      | n.d.  | n.d.   | n.d.   | n.d.   | n.d.   | n.d.  | n.d.   | n.d.   | n.d.   |
| pentyl butanoate (µg/l)        | 0,2a  | 0,2a   | 0,2a   | 0,2a   | 0,2a   | 0,2a  | 0,2a   | 0,2a   | 0,2a   |
| hexyl 2-methylbutanoate (µg/l) | n.d.  | n.d.   | n.d.   | n.d.   | n.d.   | n.d.  | n.d.   | n.d.   | n.d.   |
| propyl isovalerate (µg/l)      | <0,05 | <0,05  | <0,05  | <0,05  | <0,05  | <0,05 | <0,05  | <0,05  | <0,05  |
| butyl butanoate (µg/l)         | 15,6a | 14,0b  | 14,2b  | 12,9c  | 15,2a  | 10,2e | 9,5f   | 12,1d  | 12,1d  |
| propyl octanoate (µg/l)        | 1,8a  | 1,7ab  | 1,5cd  | 1,6bc  | 1,7ab  | 1,3de | 1,1f   | 1,3de  | 1,2ef  |
| isobutyl octanoate (µg/l)      | 0,3a  | <0,05  | <0,05  | 0,1b   | 0,2b   | <0,05 | <0,05  | <0,05  | <0,05  |

**Table S6::** volatile profiles of the red wines before and after fining

|                                  | ohne<br>Mittel | Absolut | Reskue | CarboTec | NaCalit | Purity D | Flowpure | Grandeco | Granucol |
|----------------------------------|----------------|---------|--------|----------|---------|----------|----------|----------|----------|
| Free Monoterpens                 |                |         |        |          |         |          |          |          |          |
| cis-<br>Linalooloxid<br>(µg/l)   | 6,3a           | 5,3ab   | 6,1ab  | 5,2b     | 6,2ab   | 6,3a     | 5,4ab    | 5,4ab    | 6,3a     |
| trans-<br>Linalooloxid<br>(µg/l) | 2,6a           | 2,6a    | 2,6a   | 2,4ab    | 2,6a    | 2,6a     | 2,6a     | 2,3b     | 2,6a     |
| Linalool (µg/l)                  | 13,8a          | 12,0ab  | 12,1ab | 11,6ab   | 13,0ab  | 13,8a    | 13,2ab   | 8,7b     | 11,4ab   |
| Hotrienol<br>(µg/l)              | 2,4a           | 2,0ab   | 2,3a   | 2,0ab    | 2,4a    | 2,4a     | 2,1ab    | 1,8b     | 2,4a     |
| cis-Rosenoxid<br>(µg/l)          | 0,2a           | 0,2a    | 0,2a   | 0,2a     | 0,2a    | 0,2a     | 0,2a     | 0,1b     | 0,2a     |
| trans-<br>Rosenoxid<br>(µg/l)    | n.d.           | n.d.    | n.d.   | n.d.     | n.d.    | n.d.     | n.d.     | n.d.     | n.d.     |
| trans-<br>Limonenoxid<br>(µg/l)  | n.d.           | n.d.    | n.d.   | n.d.     | n.d.    | n.d.     | n.d.     | n.d.     | n.d.     |
| beta-Terpineol<br>(µg/l)         | 0,2a           | 0,1a    | 0,2a   | 0,1a     | 0,2a    | 0,2a     | 0,1a     | 0,1a     | 0,1a     |
| Neroloxid<br>(µg/l)              | 1,4a           | 1,2ab   | 1,3ab  | 1,3ab    | 1,4ab   | 1,4a     | 1,3ab    | 0,9c     | 1,2b     |

|                               | ohne<br>Mittel | Absolut | Reskue  | CarboTec | NaCalit | Purity D | Flowpure | Grandeco | Granucol |
|-------------------------------|----------------|---------|---------|----------|---------|----------|----------|----------|----------|
| Lavandulool<br>(µg/l)         | n.d.           | n.d.    | n.d.    | n.d.     | n.d.    | n.d.     | n.d.     | n.d.     | n.d.     |
| alpha-<br>Terpineol<br>(µg/l) | 5,2a           | 4,8a    | 4,7a    | 4,8a     | 5,2a    | 5,2a     | 5,0a     | 3,8b     | 5,0a     |
| gamma-<br>Terpineol<br>(µg/l) | 0,3a           | 0,2ab   | 0,1ab   | 0,2ab    | 0,2ab   | 0,2ab    | 0,2ab    | 0,1b     | 0,2ab    |
| Nerol (µg/l)                  | 0,9a           | 0,8ab   | 0,9ab   | 0,7ab    | 0,9ab   | 0,7ab    | 0,9ab    | 0,7ab    | 0,6b     |
| Citronellol<br>(µg/l)         | 2,2a           | 1,9ab   | 1,7abc  | 2,1ab    | 1,9ab   | 2,0ab    | 2,0ab    | 1,4c     | 1,6bc    |
| Geraniol (µg/l)               | 7,2a           | 6,0abc  | 5,6abc  | 6,8ab    | 6,3ab   | 6,7ab    | 6,8ab    | 4,6c     | 5,3bc    |
| Higher Alcohols               |                |         |         |          |         |          |          |          |          |
| Propanol1<br>(mg/l)           | 28,66a         | 26,18a  | 24,89a  | 26,78a   | 27,27a  | 27,80a   | 24,98a   | 24,31a   | 28,45a   |
| Isobutanol<br>(mg/l)          | 51,10a         | 48,15a  | 47,33a  | 48,81a   | 50,24a  | 48,76a   | 48,38a   | 48,45a   | 50,75a   |
| Isoamylalkohol<br>(mg/l)      | 274,39a        | 274,39a | 273,13a | 273,40a  | 274,39a | 272,14a  | 274,39a  | 274,39a  | 274,39a  |
| Butanol 1<br>(mg/l)           | 1,09a          | 1,03ab  | 1,01b   | 1,06ab   | 1,08ab  | 1,06ab   | 1,04ab   | 1,07ab   | 1,08ab   |

|                                   | ohne<br>Mittel | Absolut  | Reskue   | CarboTec | NaCalit  | Purity D | Flowpure | Grandeco | Granucol |
|-----------------------------------|----------------|----------|----------|----------|----------|----------|----------|----------|----------|
| C6-alcohols                       |                |          |          |          |          |          |          |          |          |
| cis-3-<br>Hexen-<br>1ol<br>(mg/l) | 0,03a          | 0,03a    | 0,03a    | 0,03a    | 0,03a    | 0,03a    | 0,03a    | 0,03a    | 0,03a    |
| 1-<br>Hexano<br>l (mg/l)          | 0,13a          | 0,13a    | 0,12b    | 0,13a    | 0,13a    | 0,13a    | 0,13a    | 0,13a    | 0,13a    |
| Major ethyl esters                |                |          |          |          |          |          |          |          |          |
| ethyl acetate (mg/l)              | 79,88a         | 79,87a   | 75,59a   | 77,19a   | 77,10a   | 79,25a   | 79,87a   | 73,96a   | 79,52a   |
| ethyl lactate (mg/l)              | 203,08a        | 167,56ab | 158,64ab | 186,06ab | 147,99b  | 163,22ab | 175,82ab | 152,93ab | 154,26ab |
| ethyl propanoate<br>(mg/l)        | 0,19a          | 0,19a    | 0,19a    | 0,19a    | 0,18a    | 0,19a    | 0,19a    | 0,18a    | 0,19a    |
| diethyl succinate<br>(mg/l)       | 5,21a          | 5,18a    | 4,93a    | 4,54a    | 4,95a    | 4,09a    | 4,55a    | 5,03a    | 4,13a    |
| Minor ethyl esters                |                |          |          |          |          |          |          |          |          |
| ethyl butanoate<br>(µg/l)         | 124,4a         | 122,2a   | 119,7ab  | 115,5abc | 107,9bcd | 108,1bcd | 124,4a   | 97,5d    | 105,9    |
| ethyl isovalerate<br>(µg/l)       | 24,8a          | 24,2a    | 23,6ab   | 23,4ab   | 21,6bc   | 21,4bc   | 24,8a    | 19,3c    | 21,2bc   |

| ohne<br>Mittel                    | Absolut | Reskue  | CarboTec | NaCalit | Purity D | Flowpure | Grandeco | Granucol |         |
|-----------------------------------|---------|---------|----------|---------|----------|----------|----------|----------|---------|
| ethyl valerate<br>(µg/l)          | 2,0a    | 2,0a    | 1,9ab    | 1,8ab   | 1,8ab    | 1,8ab    | 2,0a     | 1,6b     | 1,8ab   |
| ethyl<br>hexanoate<br>(µg/l)      | 182,1a  | 166,4ab | 144,7c   | 168,8ab | 153,3bc  | 153,8bc  | 181,4a   | 117,1d   | 141,9c  |
| ethyl<br>heptanoate<br>(µg/l)     | 0,5a    | 0,4ab   | 0,4ab    | 0,1c    | 0,5a     | 0,4ab    | 0,5a     | 0,3b     | 0,3ab   |
| ethyl<br>octanoate<br>(µg/l)      | 175,3a  | 150,6b  | 107,2e   | 145,0bc | 131,7cd  | 137,4bc  | 168,4a   | 88,6f    | 120,1de |
| ethyl<br>decanoate<br>(µg/l)      | 83,2a   | 67,2b   | 53,2cd   | 63,1b   | 51,5d    | 60,3bc   | 82,1a    | 38,0e    | 49,8d   |
| ethyl<br>dodecanoate<br>(µg/l)    | 4,5a    | 4,4ab   | 3,8b     | 4,2ab   | 2,5c     | 2,5c     | 4,4a     | 2,0cd    | 1,9d    |
| ethyl<br>tetradecanoate<br>(µg/l) | 5,8a    | 2,9cd   | 2,4de    | 2,2de   | 3,1cd    | 3,8bc    | 4,8ab    | 2,3de    | 1,4e    |
| ethyl<br>hexadecanoate<br>(µg/l)  | 14,2a   | 12,4a   | 8,4b     | 8,6b    | 9,1b     | 10,0b    | 14,1a    | 8,4b     | 2,9c    |

[illegible]

|                            | ohne Mittel | Absolut | Reskue  | CarboTec | NaCalit | Purity D | Flowpure | Grandeco | Granucol |
|----------------------------|-------------|---------|---------|----------|---------|----------|----------|----------|----------|
| Isoamyl esters             |             |         |         |          |         |          |          |          |          |
| isoamyl acetate (µg/l)     | 260,2a      | 254,9a  | 244,2ab | 245,5ab  | 224,5bc | 224,0bc  | 260,2a   | 199,1c   | 222,6bc  |
| isoamyl butanoate (µg/l)   | 0,2a        | 0,2ab   | 0,1a    | 0,2ab    | 0,1a    | 0,1a     | 0,2a     | 0,1a     | 0,1a     |
| isoamyl isovalerate (µg/l) | 0,2a        | 0,1a    | 0,2a    | 0,2a     | 0,2a    | 0,1a     | 0,2a     | 0,1a     | 0,1a     |
| isoamyl hexanoate (µg/l)   | 0,3a        | 0,3a    | 0,3a    | 0,3a     | 0,3a    | 0,3a     | 0,3a     | 0,3a     | 0,3a     |
| isoamyl octanoate (µg/l)   | 0,3a        | 0,3a    | 0,3ab   | 0,3ab    | 0,2b    | 0,2b     | 0,3a     | 0,2b     | 0,2b     |
| Aromatic esters            |             |         |         |          |         |          |          |          |          |
| ethyl benzoate (µg/l)      | 0,6a        | 0,4abcd | 0,3cd   | 0,4bcd   | 0,5ab   | 0,5abc   | 0,6a     | 0,3d     | 0,3d     |
| ethyl phenylacetate (µg/l) | 6,4a        | 5,2b    | 4,2c    | 4,5c     | 5,3b    | 5,6b     | 6,3a     | 3,5d     | 4,0cd    |
|                            | ohne Mittel | Absolut | Reskue  | CarboTec | NaCalit | Purity D | Flowpure | Grandeco | Granucol |
| Higher alcohol acetate     |             |         |         |          |         |          |          |          |          |

|                              |        |        |        |        |        |        |        |       |        |
|------------------------------|--------|--------|--------|--------|--------|--------|--------|-------|--------|
| isobutyl acetate (µg/l)      | 106,6a | 104,1a | 102,9a | 98,4ab | 98,7ab | 97,4ab | 106,6a | 90,4b | 93,0b  |
| 2-methylbutyl acetate (µg/l) | 66,7a  | 62,9ab | 61,7ab | 63,7ab | 56,8bc | 56,5bc | 65,4a  | 51,1c | 51,8c  |
| hexyl acetate (µg/l)         | 40,1a  | 38,6a  | 30,6bc | 36,6ab | 33,3ab | 33,0ab | 39,7a  | 24,6c | 29,4bc |

---

Miscellaneous minor esters

|                                |       |         |         |         |          |          |        |       |        |
|--------------------------------|-------|---------|---------|---------|----------|----------|--------|-------|--------|
| isobutyl propionate (µg/l)     | 0,8a  | 0,8a    | 0,8a    | 0,8a    | 0,8a     | 0,7a     | 0,8a   | 0,7a  | 0,8a   |
| butyl isobutanoate (µg/l)      | 1,7a  | 1,7a    | 1,7a    | 1,7a    | 1,7a     | 1,5ab    | 1,6ab  | 1,6ab | 1,5b   |
| pentyl butanoate (µg/l)        | 0,2a  | 0,2a    | 0,2a    | 0,2a    | 0,2a     | 0,2a     | 0,2a   | 0,2a  | 0,2a   |
| hexyl 2-methylbutanoate (µg/l) | n.d.  | n.d.    | n.d.    | n.d.    | n.d.     | n.d.     | n.d.   | n.d.  | n.d.   |
| propyl isovalerate (µg/l)      | 0,3a  | 0,3a    | 0,3a    | 0,3a    | 0,3a     | 0,3a     | 0,2a   | 0,3a  | 0,2a   |
| butyl butanoate (µg/l)         | 16,8a | 13,4bcd | 13,0bcd | 15,0abc | 13,8abcd | 13,9abcd | 16,4ab | 10,9d | 12,8cd |
| propyl octanoate (µg/l)        | n.d.  | n.d.    | n.d.    | n.d.    | n.d.     | n.d.     | n.d.   | n.d.  | n.d.   |

---

|             |         |        |          |         |          |          |          |          |
|-------------|---------|--------|----------|---------|----------|----------|----------|----------|
| ohne Mittel | Absolut | Reskue | CarboTec | NaCalit | Purity D | Flowpure | Grandeco | Granucol |
|-------------|---------|--------|----------|---------|----------|----------|----------|----------|

---



|                              |      |       |       |       |       |      |      |       |       |
|------------------------------|------|-------|-------|-------|-------|------|------|-------|-------|
| isobutyl<br>octanoate (µg/l) | 0,2a | <0,05 | <0,05 | <0,05 | <0,05 | 0,1b | 0,1b | <0,05 | <0,05 |
|------------------------------|------|-------|-------|-------|-------|------|------|-------|-------|
